# Supplementary material
Source: Elsevier journal article supplement (https://www.sciencedirect.com/science/article/pii/S1695403319303017)
Supplement: mmc1 [file S1695403319303017:mmc1.docx]

**Supplemental Digital Content 1: Pediatric Sequential Organ Failure Assessment (pSOFA) score**


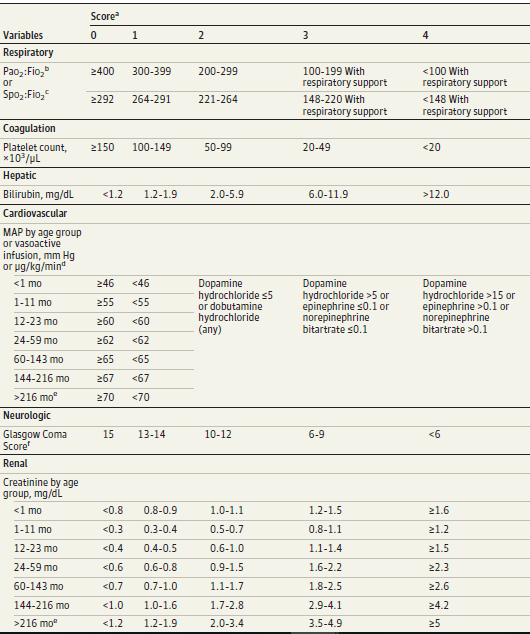


[**Matics TJ**](https://www.ncbi.nlm.nih.gov/pubmed/?term=Matics%20TJ%5BAuthor%5D&cauthor=true&cauthor_uid=28783810)**,**[**Sanchez-Pinto LN**](https://www.ncbi.nlm.nih.gov/pubmed/?term=Sanchez-Pinto%20LN%5BAuthor%5D&cauthor=true&cauthor_uid=28783810). Adaptation and Validation of a Pediatric Sequential Organ Failure Assessment Score and Evaluation of the Sepsis-3 Definitions in Critically Ill Children. [*JAMA Pediatr*.](https://www.ncbi.nlm.nih.gov/pubmed/?term=Adaptation+and+Validation+of+a+Pediatric+Sequential+Organ+Failure+Assessment+Score+and+Evaluation+of+the+Sepsis-3+Definitions+in+Critically+Ill+Children) 2017; 171(10):e172352.
